# Supplementary material for: Virulence Profiles and Antibiotic Susceptibility of Escherichia coli Strains from Pet Reptiles
Source: MDPI journal article supplement (doi:10.3390/pathogens11020127), 2022-01-21
Supplement: s1 [file s1]

**Table S1.** Sequences of primers used to detect virulence genes, amplicon sizes and references.

| Pathovar      | Gene           | Primers (5'- 3')                                                     | Virulence factor                     | Amplicon size (bp) | References |
|---------------|----------------|----------------------------------------------------------------------|--------------------------------------|--------------------|------------|
| EHEC,<br>EPEC | <i>escV</i>    | ATTCTGGCTCTCTTCTTCTTTATGGCTG<br>CGTCCCCTTTTACAAACTTCATCGC            | component EscV                       | 544                | [14]       |
|               | <i>ent</i>     | TGGGCTAAAAGAAGACACACTG<br>CAAGCATCCTGATTATCTCACC                     | enterotoxin                          | 629                |            |
|               | <i>eaeA</i>    | GACCCGGCACAAGCATAAGC<br>CCACCTGCAGCAACAAGAGG                         | intimin                              | 384                | [14]       |
| EPEC          | <i>bfpB</i>    | GACACCTCATTGCTGAAGTCG<br>CCAGAACACCTCCGTTATGC                        | bundle-forming pilus                 | 910                | [14]       |
| ETEC          | <i>elt</i>     | GAACAGGAGGTTTCTGCGTTAGGTG<br>CTTTCAATGGCTTTTTTTTGGGAGTC              | heat labile toxin LT                 | 655                | [14]       |
|               | <i>estIa</i>   | CCTCTTTTAGYCAGACARCTGAATCASTTG<br>CAGGCAGGATTACAACAAAGTTCACAG        | heat-stable enterotoxin a            | 157                |            |
|               | <i>estIb</i>   | TGTCTTTTTCACCTTTCGCTC<br>CGGTACAAGCAGGATTACAACAC                     | heat-stable enterotoxin b            | 171                |            |
| EIEC          | <i>invE</i>    | CGATAGATGGCGAGAAATTATATCCCG<br>CGATCAAGAATCCCTAACAGAAGAATCAC         | invasion protein                     | 766                | [14]       |
|               | <i>ipaH</i>    | GAA AAC CCT CCT GGT CCA TCA GG<br>GCC GGT CAG CCA CCC TCT GAG AGT AC | adhesin siderophore                  | 437                |            |
| EHEC          | <i>stx1</i>    | ATA AAT CGC CAT TCG TTG ACT AC<br>AGA ACG CCC ACT GAG ATC ATC        | Shiga toxin 1                        | 180                | [14]       |
|               | <i>stx2</i>    | GGCACTGTCTGAAACTGCTCC<br>TCGCCAGTTATCTGACATTCTG                      | Shiga toxin 2                        | 255                |            |
|               | <i>hlyA</i>    | GCATCATCAAGCGTACGTTCC<br>AATGAGCCAAGCTGGTTAAGCT                      | hemolysin A                          | 534                |            |
|               | <i>saa</i>     | CGTGATGAACAGGCTATTGC<br>ATGGACATGCCTGTGGCAAC                         | STEC autoagglutinating adhesin       | 119                |            |
| EAEC          | <i>astA</i>    | TGCCATCAACACAGTATATCCG<br>ACGGCTTTGTAGTCCTTCCAT                      | EAST1 toxin                          | 102                | [14]       |
|               | <i>aggR</i>    | ACGCAGAGTTGCCTGATAAAG<br>AATACAGAATCGTCAGCATCAGC                     | transcriptional activator            | 400                |            |
|               | <i>pic</i>     | AGCCGTTTCCGCAGAAGCC<br>AAATGTCAGTGAACCGACGATTGG                      | serine protease                      | 1,111              |            |
| NTEC          | <i>cnf</i>     | TTATATAGTCGTCAAGATGGA<br>CACTAAGCTTTACAATATTGA                       | Cytotoxic necrotizing factor         | 633                | [30]       |
| APEC,<br>UPEC | <i>irp-2</i>   | AAGGATTCGCTGTTACCGGAC<br>AACTCCTGATACAGGTGGC                         | yersiniabactin synthetase            | 413                | [29]       |
|               | <i>iss</i>     | ATCACATAGGATTCTGCCG<br>CAGCGGAGTATAGATGCCA                           | increased serum survival             | 306                |            |
|               | <i>pap-C</i>   | TGATATCACGCAGTCAGTAGC<br>CCGGCCATATTACATAA                           | papACEFG, genes of P fimbriae operon | 501                |            |
|               | <i>tsh</i>     | ACTATTCTCTGCAGGAAGTC<br>CTTCCGATGTTCTGAACGT                          | temperature-sensitive haemagglutinin | 824                |            |
|               | <i>cva/cvi</i> | TGGTAGAATGTGCCAGAGCAAG<br>GAGCTGTTTGTAGCGAAGCC                       | colicin V                            | 1181               |            |
|               | <i>iucD</i>    | ACAAAAAGTTCTATCGCTTCC<br>CCTGATCCAGATGATGCTC                         | aerobactin                           | 714                |            |

|              |                                                                        |                                          |     |      |
|--------------|------------------------------------------------------------------------|------------------------------------------|-----|------|
| <i>vat</i>   | TCCTGGGACATAATGGTCAG<br>GTGTCAGAACGGAATTGT                             | vacuolating toxin                        | 981 | [14] |
| <i>ompT</i>  | TCATCCCCGGAAGCCTCCCTCACTACTAT<br>TAGCGTTTGCTGCACTGGCTTCTGATAC          | outer membrane prote-<br>ase T           | 496 |      |
| <i>iutA</i>  | GGCTGGACATCATGGGAACTGG<br>CGTCGGGAACGGGTAGAATCG                        | aerobactin siderophore<br>receptor       | 302 |      |
| <i>fyuA</i>  | TGATTAACCCCGCGACGGGAA<br>CGCAGTAGGCACGATGTTGTA<br>GCGCATTGCTGATACTGTTG | yersiniabactin sidero-<br>phore receptor | 880 |      |
| <i>kpsII</i> | CATCCAGACGATAAGCATGAGCA                                                | capsular antigen                         | 272 | [4]  |
| <i>traT</i>  | GGTGTGGTGCGATGAGCACAG<br>CACGGTTCAGCCATCCCTGAG                         | complement resistance<br>protein         | 290 |      |

**Table S2.** Sequences of primers used to detect resistance genes.

| Target gene      | Sequence (5'–3')                                                       | Annealing tem-<br>perature (°C) | Size of PCR<br>product (bp) | Reference |
|------------------|------------------------------------------------------------------------|---------------------------------|-----------------------------|-----------|
| <i>blaTEM</i>    | GAG TAT TCA ACA TTT TCG T<br>ACC AAT GCT TAA TCA GTG A                 | 50                              | 445                         | [35]      |
| <i>blaCTX</i>    | CGCCGCATACACTATTCTCAGAAATGA<br>ACGCTCACCGGCTCCAGATTTAT                 |                                 | 593                         |           |
| <i>blaOXA</i>    | ATGTGCAGyACCAGTAArGTkATGGC<br>TGGGTrAArTArGTsACCAGAAyCAGCGG            |                                 | 813                         |           |
| <i>blaSHV</i>    | ACACAATACATATCAACTTCGC<br>AGTGTGTTTAGAATGGTGATC                        |                                 | 237                         |           |
| <i>tetA</i>      | GTG AAA CCC AAC ATA CCC C<br>GAA GGC AAG CAG GAT GTA G                 | 63                              | 887                         | [36]      |
| <i>tetB</i>      | CCT TAT CAT GCC AGT CTT GC<br>ACT GCC GTT TTT TCG CC                   |                                 | 773                         |           |
| <i>tetC</i>      | GCTGTAGGCATAGGCTTGGT<br>GCCGGAAGCGAGAAGAATCA                           |                                 | 888                         |           |
| <i>tetM</i>      | GTG GAC AAA GGT ACA ACG AG<br>CGG TAA AGT TCG TCA CAC AC               | 62                              | 406                         | [23]      |
| <i>tetO</i>      | AAC TTA GGC ATT CTG GCT CAC<br>TCC CAC TGT TCC ATA TCG TCA             |                                 | 515                         |           |
| <i>tetK</i>      | GAT CAA TTG TAG CTT TAG GTG AAG G<br>TTT TGT TGA TTT ACC AGG TAC CAT T |                                 | 155                         |           |
| <i>tetL</i>      | TGG TGG AAT GAT AGC CCA TT<br>CAG GAA TGA CAG CAC GCT AA               |                                 | 229                         |           |
| <i>aadA</i>      | GTGGATGGCGGCCTGAAGCC<br>AATGCCCAGTCGGCAGCG                             | 63                              | 525                         | [36]      |
| <i>strA/strB</i> | ATGGTGGACCCTAAACTCT<br>CGTCTAGGATCGAGACAAAG                            |                                 | 893                         |           |
| <i>aac(3)-II</i> | ATA TCG CGA TGC ATA CGC GG<br>GAC GGC CTC TAA CCG GAA GG               | 56                              | 877                         | [14]      |
| <i>aac(3)-IV</i> | CTT CAG GAT GGC AAG TTG GT<br>TCA TCT CGT TCT CCG CTC AT               | 55                              | 286                         |           |
| <i>aphA1</i>     | ATG GGC TCG CGA TAA TGT C<br>CTC ACC GAG GCA GTT CCA T                 | 50                              | 600                         | [14]      |
| <i>aphA2</i>     | GAA CAA GAT GGA TTG CAC GC<br>GCT CTT CAG CAA TAT CAC GG               | 50                              | 680                         |           |
| <i>sul1</i>      | CGGCGTGGGCTACCTGAACG                                                   | 65                              | 433                         | [36]      |

|                 |                                                                            |     |          |
|-----------------|----------------------------------------------------------------------------|-----|----------|
| <i>sul2</i>     | GCCGATCGCGTGAAGTTCCG<br>CGG CAT CGT CAA CAT AAC CT<br>TGTGCGGATGAAGTCAGCTC | 721 |          |
| <i>sul3</i>     | CAA CGG AAG TGG GCG TTG TGG A<br>GCT GCA CCA ATT CGC TGA ACG               | 244 |          |
| <i>dfrA1</i>    | TGGTAGCTATATCGAAGAATGGAGT<br>TATGTTAGAGGCGAAGTCTTGGGTA                     | 425 |          |
| <i>dfrA5</i>    | AGCTACTCTTTAAAGCCTTGACGTA<br>GTGTTGCTCAAAAACAACCTTCG                       | 60  | 341 [37] |
| <i>dfrA7-17</i> | ACATTTGACTCTATGGGTGTTCTTC<br>AAAACCTGTTCAAAAACCAAATTGAA                    | 280 |          |

**Table S3.** Primer sequences used to determine phylogenetic groups in *E. coli* strains.

| Gene        | Sequence of primers (5'-3')                                        | PCR product                                                                                                                                    | Amplicon size [bp] | Reference |
|-------------|--------------------------------------------------------------------|------------------------------------------------------------------------------------------------------------------------------------------------|--------------------|-----------|
| <i>yjaA</i> | TGAAGTGTCAAGGAGACGCTG<br>TGAAGTGTCAAGGAGACGCTG                     | stress response protein                                                                                                                        | 211                |           |
| TspE4.C2    | GAG TAA TGT CGG GGC ATT CA<br>CGC GCC AAC AAA GTA TTA CG           | anonymous DNA fragment                                                                                                                         | 152                |           |
| <i>chuA</i> | GAC GAA CCA ACG GTC AGG AT<br>TGC CGC CAG TAC CAA AGA CA           | outer membrane hemin receptor<br>ChuA                                                                                                          | 279                | [35]      |
| <i>svg</i>  | TCCGGCTGATTACAAACCAAC<br>CTGCACGAGGTTGTAGTCCTG                     | hypothetical protein, sequence lo-<br>cated at open reading frame (ORF)<br>specific for virulent B2 <sub>1</sub> subgroup of<br><i>E. coli</i> | 434                |           |
| <i>uidA</i> | ATC ACC GTG GTG ACG CATGTC GC<br>CAC CAC GAT GCC ATG TTC ATC TGC-3 | glucuronidase                                                                                                                                  | 486                |           |
